# Supplementary material
Source: Springer Nature journal article supplement (https://www.springermedizin.de/resource/supplementary/13058_2010_9487_MOESM12_ESM.pdf/9702268)

## MCF-7

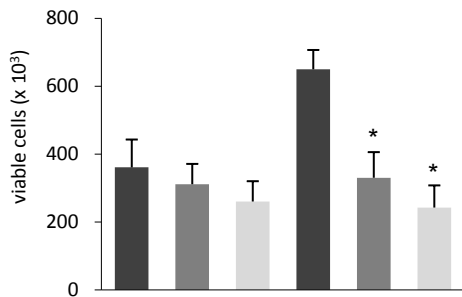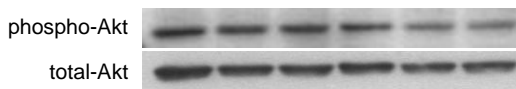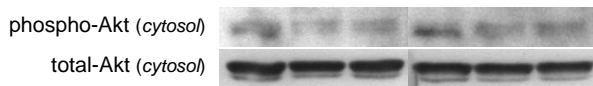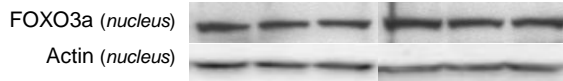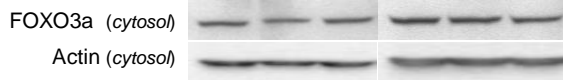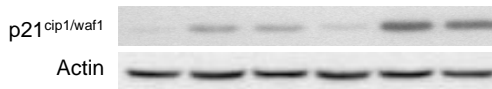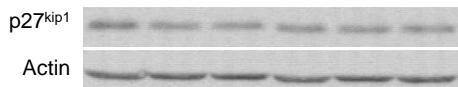

μM CTet      -    6    12      -    6    12  
                     24 h                      48 h

## MDA-MB-231

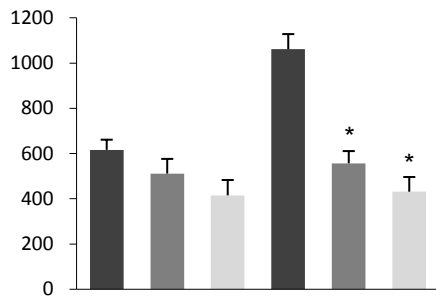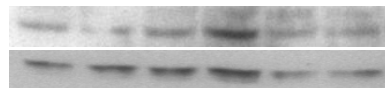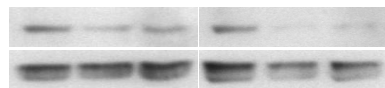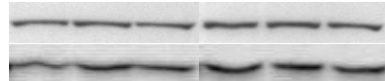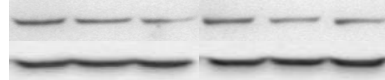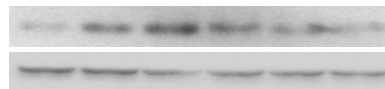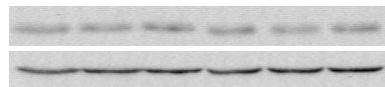

-    6    12      -    6    12  
                     24 h                      48 h

Supplement: MOESM12 [file 9702268]
